# Supplementary material for: Reaction sampling and reactivity prediction using the stochastic surface walking method
Source: Royal Society of Chemistry journal article supplement (doi:10.1039/c4cp04456h), 2014-12-01
Supplement: c4cp04456h1.pdf [file c4cp04456h1.pdf]

## Supplementary information

# Reaction Sampling and Reactivity Prediction Using Stochastic Surface Walking Method

Xiao-Jie Zhang, Zhi-Pan Liu\*

Shanghai Key Laboratory of Molecular Catalysis and Innovative Materials,  
Department of Chemistry, Key Laboratory of Computational Physical Science  
(Ministry of Education), Fudan University, Shanghai 200433, China

### Vinyl alcohol and formaldehyde recombination

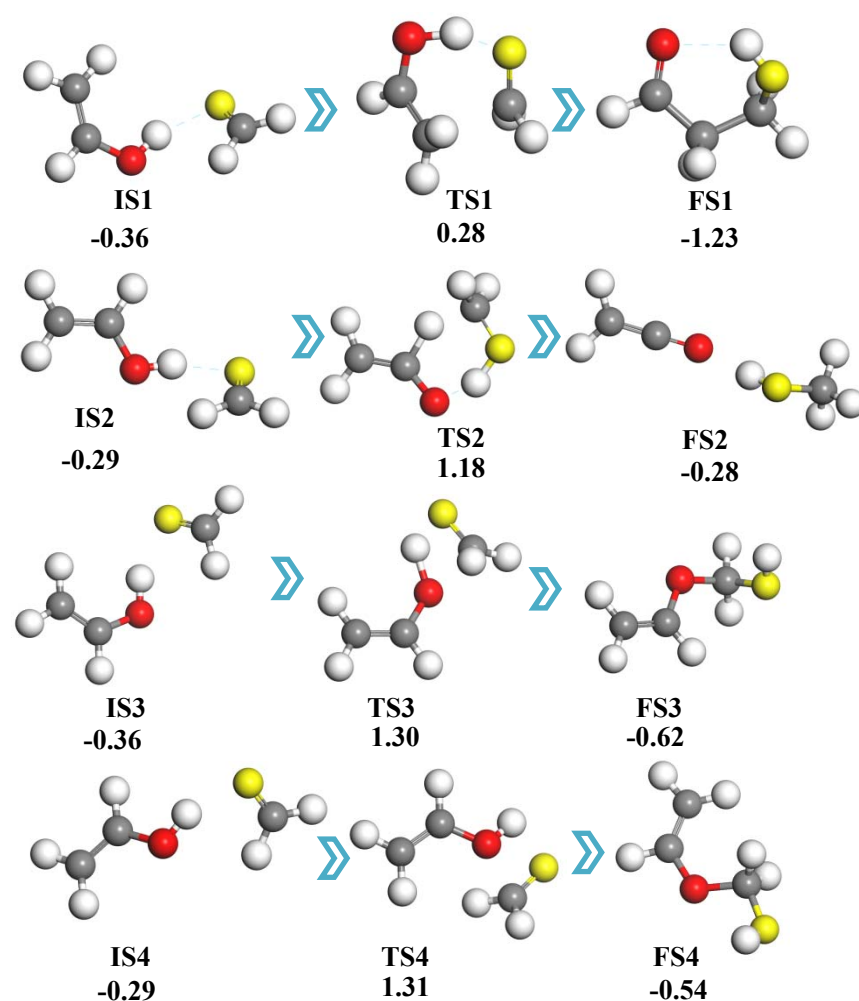

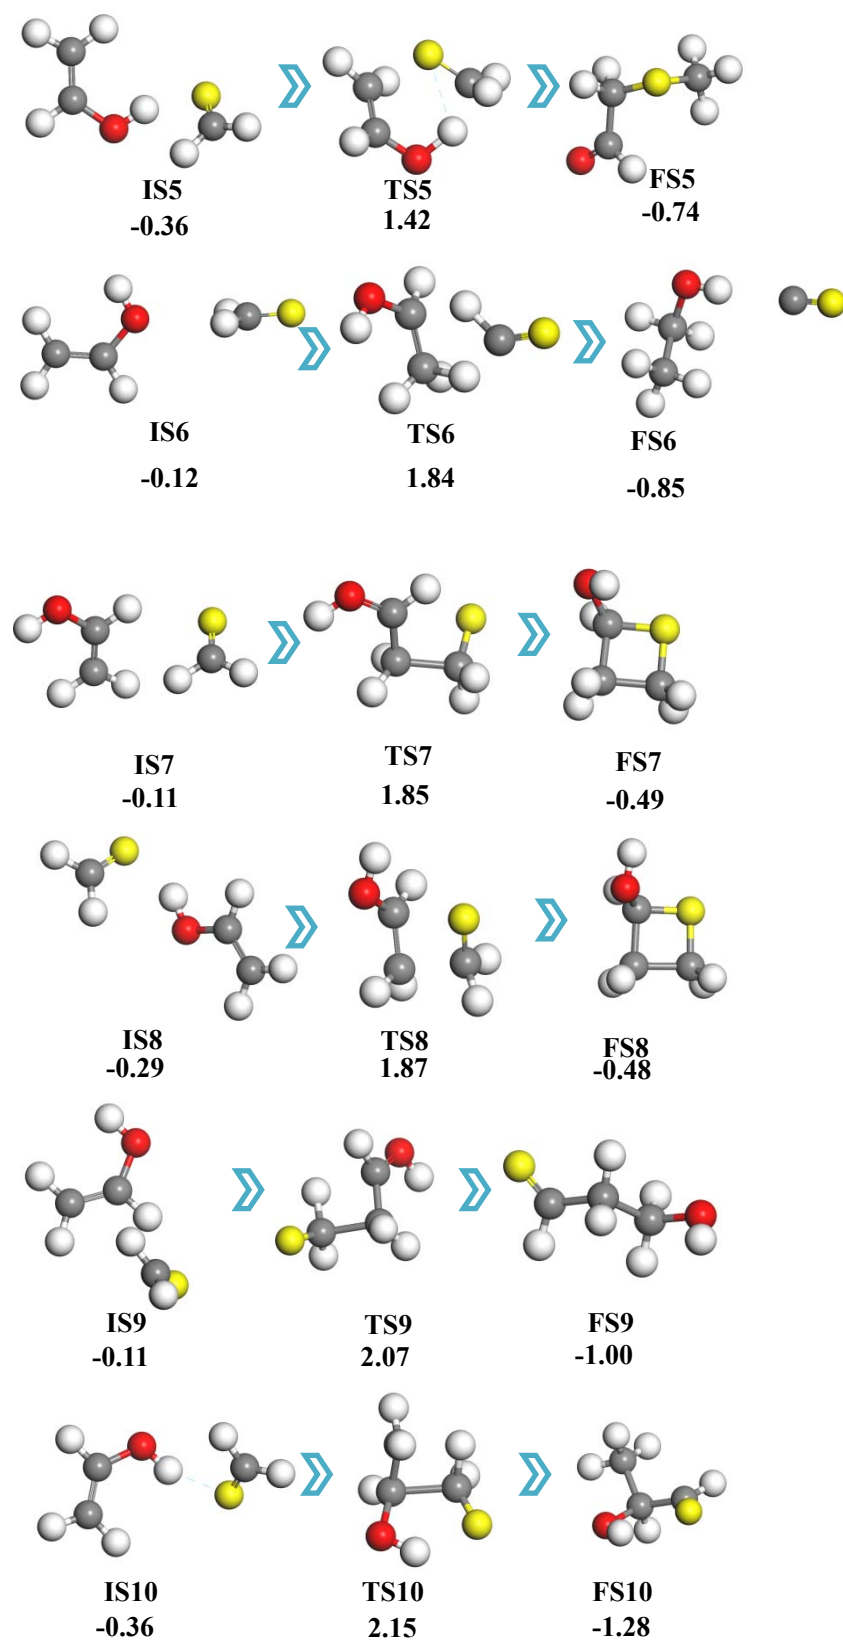

**Figure S1** Reaction snapshots (IS, TS and FS) and energetics (in eV) for the ten low energy pathways in vinyl alcohol and formaldehyde recombination

## Epoxypropane hydrolysis

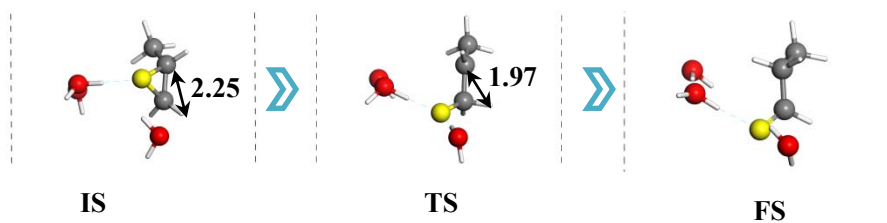

**Figure S2** Reaction snapshots for the Epo-P2 pathway obtained from SSW-RS. Key distances (in Å) are labeled.

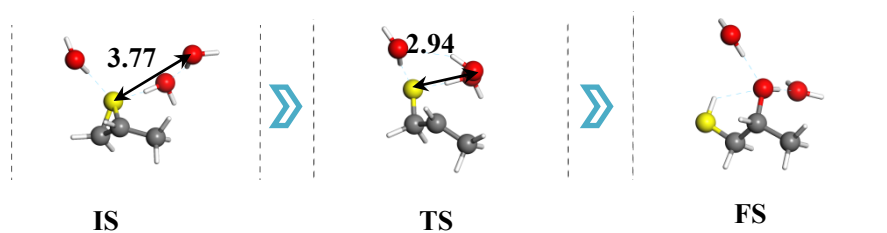

**Figure S3** Reaction snapshots for the Epo-P3 pathway obtained from SSW-RS. Key distances (in Å) are labeled.

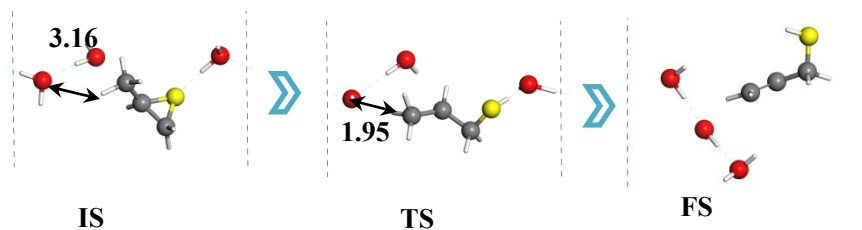

**Figure S4** Reaction snapshots for the Epo-P4 pathway obtained from SSW-RS. Key distances (in Å) are labeled.

## $\beta$ -D-glucopyranose decomposition

For the  $\beta$ -D-glucopyranose system, we have obtained 354 minima of  $\beta$ -D-glucopyranose with different conformations, together with 156 pathways from 8 parallel running SSW-RS trajectories. Below we show the energy distribution of these conformation isomers calculated using PBE functional and NAO basis (SIESTA), which expands more than 1 eV starting from the GM. We also show the typical structural conformations in Figure S5, featuring with different H-bonding network. We can see that above 0.3 eV, the energy of the conformation isomers is already rather close, forming continuous-like spectrum. This indicates that SSW-RS is able to sample low energy intermediate structures with various H-bonding network. The conformations reported in Figure 8 (for the reactions) are only those initial states that are related to the low energy pathways.

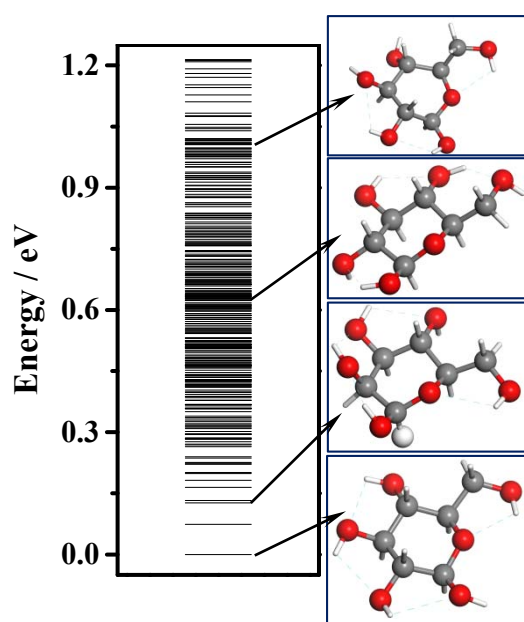

**Figure S5** The configuration energy spectrum of  $\beta$ -D-glucopyranose obtained from SSW-RS. Grey: C atom, Red: O atom; White: H atom

**Table S1** The SSW-RS results for the  $\beta$ -D-glucopyranose decomposition, including all the 15 possible products identified (the first five products are discussed in the main text, see Table 1).

<sup>#</sup>  $N_{\text{path}}$  is the number of pathways to produce the target product identified from SSW-RS;

<sup>\$</sup>  $N_{\text{tot}}$  equal to 156, being the total number of pathways obtained from SSW-RS;

<sup>\*</sup>  $N_{\text{SSW}}$  equal to 3376, being the total number of SSW steps.

| Product                                                                             | $N_{\text{path}}^{\#}$ | $N_{\text{path}}/N_{\text{tot}}^{\$}$ | $N_{\text{path}}/N_{\text{SSW}}^*$ |
|-------------------------------------------------------------------------------------|------------------------|---------------------------------------|------------------------------------|
| 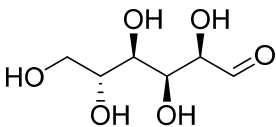   | 16                     | 16%                                   | 0.47%                              |
|   | 10                     | 10%                                   | 0.30%                              |
|  | 14                     | 14%                                   | 0.41%                              |
|  | 11                     | 11%                                   | 0.33%                              |
|  | 3                      | 3%                                    | 0.09%                              |
|  | 1                      | 1%                                    | 0.03%                              |
|  | 1                      | 1%                                    | 0.03%                              |

|                                                                                     |   |    |       |
|-------------------------------------------------------------------------------------|---|----|-------|
| 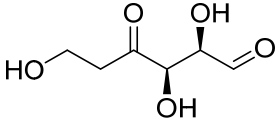   | 1 | 1% | 0.03% |
|    | 1 | 1% | 0.03% |
|    | 1 | 1% | 0.03% |
|    | 1 | 1% | 0.03% |
|   | 1 | 1% | 0.03% |
|  | 3 | 3% | 0.09% |
|  | 1 | 1% | 0.03% |
|  | 1 | 1% | 0.03% |

**Table S2 Reaction free energy barrier and free energy obtained by M06-2X/ aug-cc-pvtz method**

| <b>Pathway</b> | <b><math>\Delta_r H^{\text{TS}}_{800\text{K}}/\text{eV}</math></b> | <b><math>\Delta_r G^{\text{TS}}_{800\text{K}}/\text{eV}</math></b> | <b><math>\Delta_r H^{\text{FS}}_{800\text{K}}/\text{eV}</math></b> | <b><math>\Delta_r G^{\text{FS}}_{800\text{K}}/\text{eV}</math></b> |
|----------------|--------------------------------------------------------------------|--------------------------------------------------------------------|--------------------------------------------------------------------|--------------------------------------------------------------------|
| <b>1</b>       | 1.52                                                               | 1.82                                                               | 0.73                                                               | 0.65                                                               |
| <b>2</b>       | 2.23                                                               | 2.26                                                               | 0.14                                                               | 0.18                                                               |
| <b>3</b>       | 2.38                                                               | 2.61                                                               | 0.60                                                               | 0.61                                                               |
| <b>4</b>       | 2.50                                                               | 2.56                                                               | 0.35                                                               | 0.46                                                               |
| <b>5</b>       | 3.14                                                               | 3.06                                                               | 0.43                                                               | -0.03                                                              |
